# Supplementary material
Source: publisher site journal article supplement (http://content.karger.com/ProdukteDB/miscArchiv/000/200/082/Suppl.Material.pdf)
Supplement: Supplementary file 1 [file Suppl.Material.pdf]

## Supplementary data

| BAC      | sequence              |
|----------|-----------------------|
| 156E22   | CAGTGGGAACGCCATTATCT  |
|          | GCAACATTGATGGGCACTAC  |
| 643G16   | AGCAGCACCTCTCCTGGTAT  |
|          | TTGGCGGTTCTGGATCTTAG  |
| 1012A1-a | AGCTCATCAGGCTTTCAGAC  |
|          | CCACCACTCTGCTCTCATTA  |
| 1012A1-b | TATCAAGGCCAGACAGAGAC  |
|          | GAGGGAGAAACGATCAGGTA  |
| 977H16   | AATGGCAGCCGTCACGTCTC  |
|          | TGCTGCCTAGCCAGGCTAAG  |
| 68M10    | TTGCACTGTAGCGTTGTCTG  |
|          | CCTGAGAGCCTGAAATCTGA  |
| 204K16   | GCTGGGCTGCTGTTTATAAG  |
|          | CATCACCTCTGTGAGAGTA   |
| 108B17   | TGGCCTTGTGCATCTCACTA  |
|          | TGTTTCAGCGCATCCAGAGTC |

SD Table 1: oligonucleotide sequence used for genomic qPCR
